# Supplementary material
Source: Springer Nature journal article supplement (https://www.springermedizin.de/resource/supplementary/12936_2010_1442_MOESM4_ESM.pdf/9549816)

**Percentage of early and late hatch**

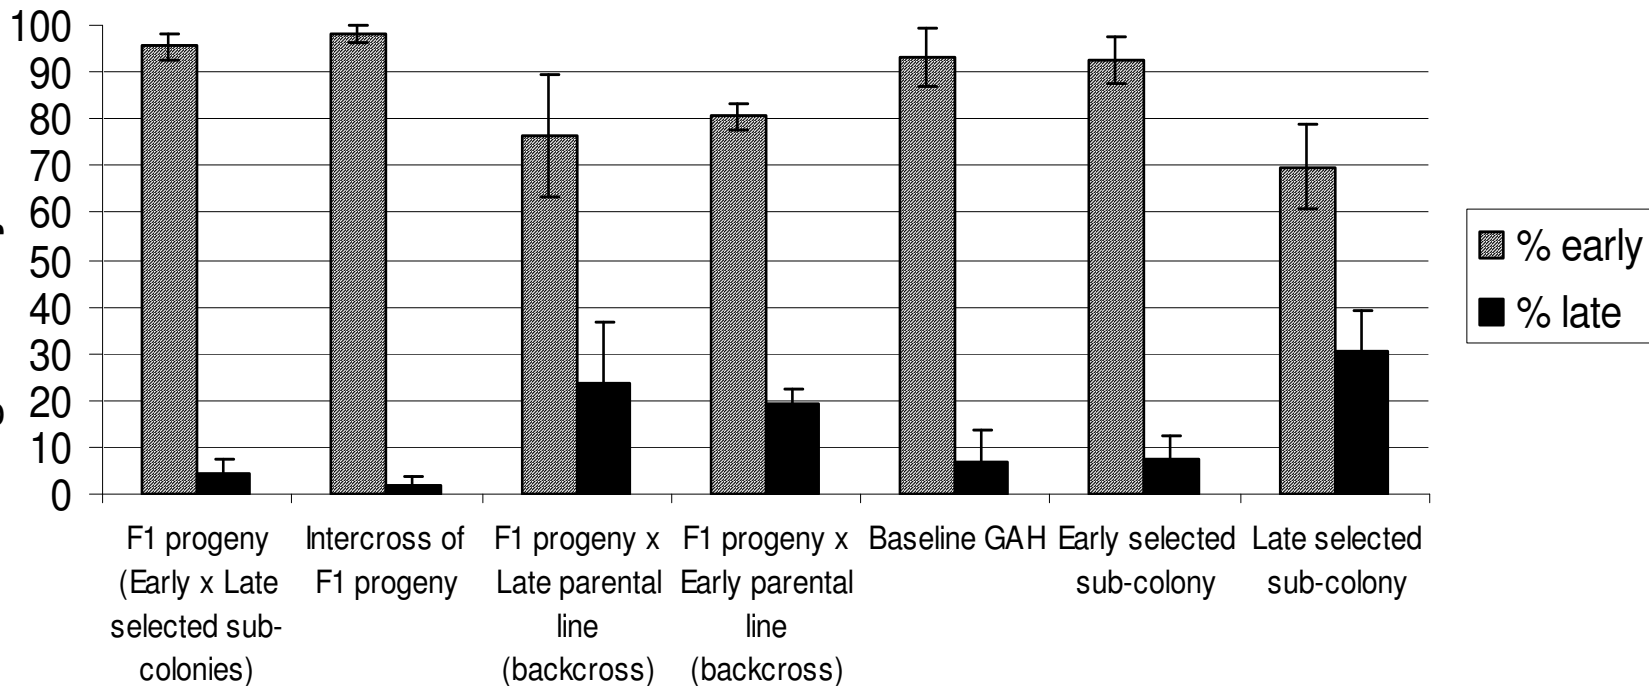

**Crosses and controls**

Supplement: MOESM4 [file 9549816]
